# Supplementary material for: New chiral coordination polymers constructed from well elaborated achiral and chiral ligands
Source: Royal Society of Chemistry journal article supplement (doi:10.1039/c2ra00046f), 2012-01-01

## Electronic Supporting Information (ESI)

# New Chiral Coordination Polymers Constructed from Well Elaborated Achiral and Chiral Ligands

Yun-Wu Li, Ying Tao, Li-Fu Wang, Tong-Liang Hu, and Xian-He Bu\*

*Department of Chemistry, and Tianjin Key Lab on Metal and Molecule-based Material Chemistry,  
Nankai University, Tianjin 300071, China*

### Contents List

- 1. Scheme S1:** Structures of two ligands: H<sub>2</sub>pdt and H<sub>2</sub>cdtp.
- 2. Scheme S2:** The route for ligands synthesis.
- 3. Table S1:** The selected bond lengths [Å] and angles [°] of CCPs **1** and **2**.
- 4. Fig. S1-2:** XRD of CCPs **1** and **2**.
- 5. Fig. S3:** Twisted conformations of ligands H<sub>2</sub>pdt and their torsion dihedral angles.
- 6. Scheme S3:** Two coordination modes of H<sub>2</sub>cdtp ligands.

---

● Corresponding author. E-mail: [buxh@nankai.edu.cn](mailto:buxh@nankai.edu.cn). Fax: +86-22-23502458.

### 1. Scheme S1: Structures of two ligands: H<sub>2</sub>pdtP and H<sub>2</sub>cdtp.

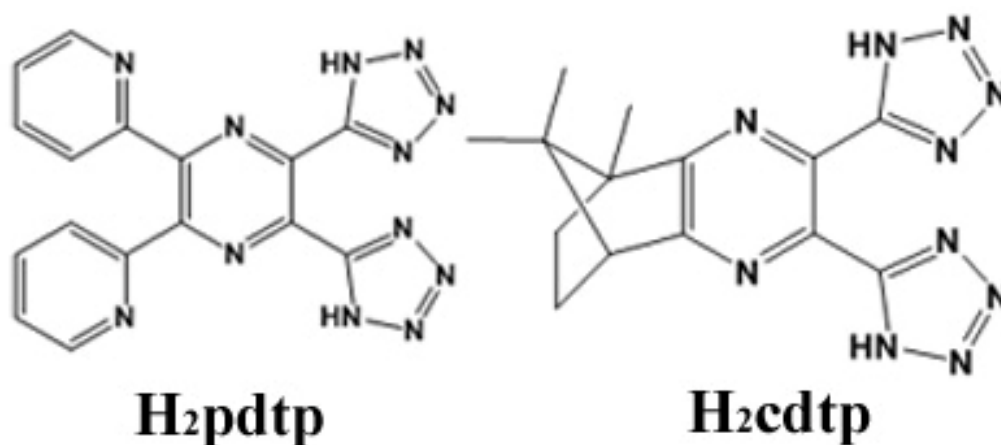

### 2. Scheme S2: The route for ligands synthesis.<sup>S1</sup>

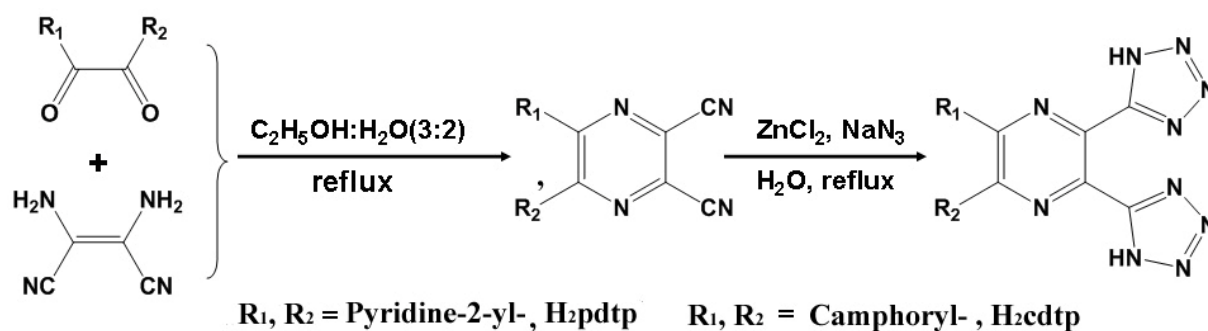

### Reference

S1 (a) F. D. Popp, *J. Heterocycl. Chem.*, 1974, **11**, 79; (b) W. Ried, S. Aboul-Fetouh, *Tetrahedron*, 1988, **44**, 3399; (c) Z. P. Demko, K. B. Sharpless, *Org. Lett.*, 2001, **3**, 4091; (d) Z. P. Demko, K. B. Sharpless, *J. Org. Chem.*, 2001, **66**, 7945; (e) J. R. Li, Y. Tao, Q. Yu, X. H. Bu, H. Sakamoto, S. Kitagawa, *Chem.–Eur. J.*, 2008, **14**, 2771; (f) Y. Tao, J. R. Li, Z. Chang, X. H. Bu, *Cryst. Growth Des.*, 2010, **10**, 564; (g) T. L. Hu, Y. Tao, Z. Chang, X. H. Bu, *Inorg. Chem.*, 2011, **50**, 10994.

**3. Table S1:** The selected bond lengths [ $\text{\AA}$ ] and angles [ $^\circ$ ] of CCPs **1** and **2**.

| <b>1</b>                                                                                         |            |                    |            |
|--------------------------------------------------------------------------------------------------|------------|--------------------|------------|
| Hg(1)-N(3A)                                                                                      | 2.268(6)   | Hg(1)-N(3)         | 2.268(6)   |
| Hg(1)-Cl(1)                                                                                      | 2.476(2)   | Hg(1)-Cl(1A)       | 2.476(2)   |
| N(3A)-Hg(1)-N(3)                                                                                 | 116.7(3)   | N(3A)-Hg(1)-Cl(1)  | 106.32(18) |
| N(3)-Hg(1)-Cl(1)                                                                                 | 101.78(18) | N(3A)-Hg(1)-Cl(1A) | 101.78(18) |
| N(3)-Hg(1)-Cl(1A)                                                                                | 106.32(18) | Cl(1)-Hg(1)-Cl(1A) | 124.91(11) |
| Symmetry transformations used to generate equivalent atoms:                                      |            |                    |            |
| A: $-y + 1, -x + 1, -z + 1/2$ ; B: $y, x, -z$                                                    |            |                    |            |
| <b>2</b>                                                                                         |            |                    |            |
| Zn(1)-N(3)                                                                                       | 2.024(5)   | Zn(1)-N(17)        | 2.045(5)   |
| Zn(1)-N(16)                                                                                      | 2.059(5)   | Zn(1)-N(27A)       | 2.070(6)   |
| Zn(1)-N(2)                                                                                       | 2.583(6)   | Zn(3)-N(20B)       | 2.047(5)   |
| Zn(3)-N(6C)                                                                                      | 2.051(5)   | Zn(3)-N(23)        | 2.050(5)   |
| Zn(3)-N(10C)                                                                                     | 2.060(5)   | Zn(3)-N(22)        | 2.475(6)   |
| Zn(2)-N(13)                                                                                      | 1.979(5)   | Zn(2)-N(26)        | 1.997(5)   |
| Zn(2)-N(30)                                                                                      | 2.042(5)   | Zn(2)-N(11)        | 2.509(6)   |
| O(1)-Zn(2)                                                                                       | 2.049(6)   |                    |            |
| N(3)-Zn(1)-N(17)                                                                                 | 151.3(2)   | N(3)-Zn(1)-N(16)   | 106.6(2)   |
| N(17)-Zn(1)-N(16)                                                                                | 91.9(2)    | N(3)-Zn(1)-N(2)    | 69.49(18)  |
| N(17)-Zn(1)-N(2)                                                                                 | 92.8(2)    | N(16)-Zn(1)-N(2)   | 80.74(19)  |
| N(23)-Zn(3)-N(10C)                                                                               | 111.7(2)   | N(20B)-Zn(3)-N(22) | 82.2(2)    |
| N(23)-Zn(3)-N(22)                                                                                | 70.0(2)    | N(10C)-Zn(3)-N(22) | 178.3(2)   |
| N(13)-Zn(2)-N(26)                                                                                | 114.0(2)   | N(13)-Zn(2)-N(30)  | 108.7(2)   |
| N(26)-Zn(2)-N(30)                                                                                | 89.6(2)    | N(13)-Zn(2)-O(1)   | 115.0(3)   |
| N(26)-Zn(2)-O(1)                                                                                 | 127.4(3)   | N(30)-Zn(2)-O(1)   | 92.0(2)    |
| N(13)-Zn(2)-N(11)                                                                                | 72.1(2)    | N(26)-Zn(2)-N(11)  | 99.9(2)    |
| N(30)-Zn(2)-N(11)                                                                                | 169.2(2)   | O(1)-Zn(2)-N(11)   | 78.2(2)    |
| Symmetry transformations used to generate equivalent atoms:                                      |            |                    |            |
| A: $-x + 2, y + 1/2, -z + 1/2$ ; B: $-x + 3/2, -y + 2, z + 1/2$ ; C: $-x + 5/2, -y + 2, z + 1/2$ |            |                    |            |

4. Fig. S1-2: XRD of CCPs 1 and 2.

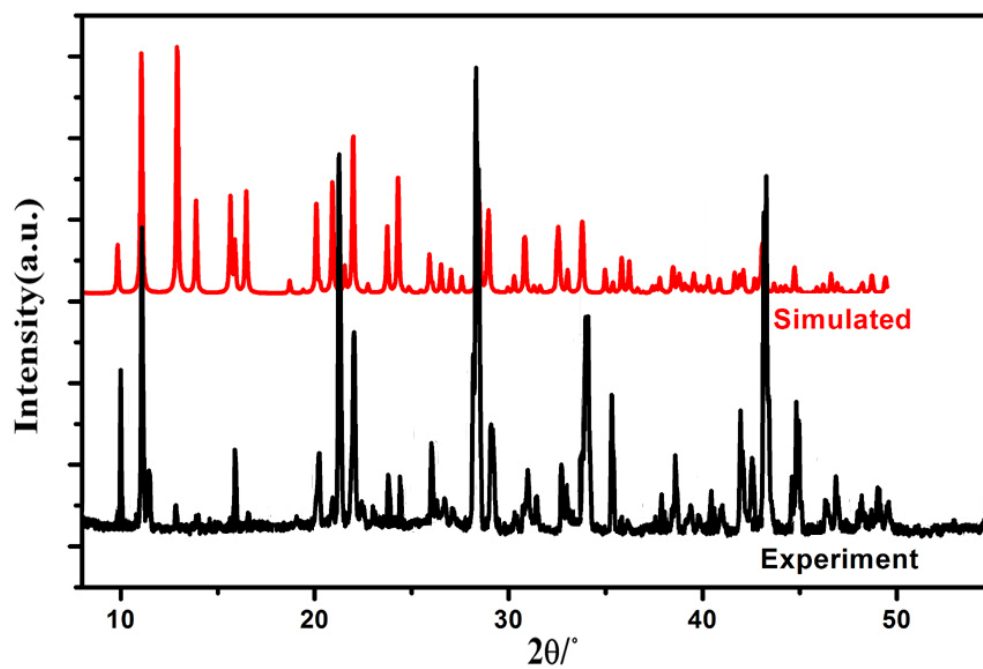

Fig. S1 XRD of compound 1.

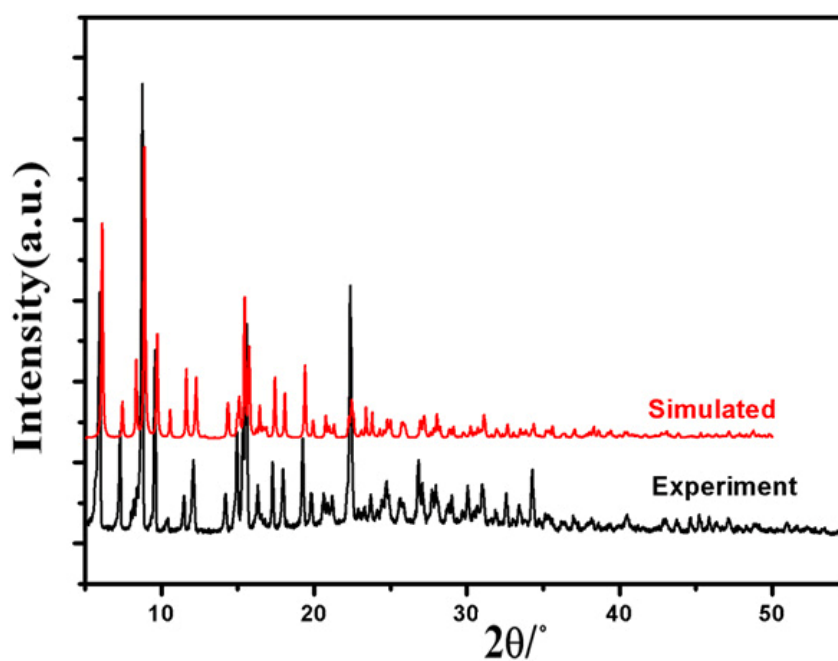

Fig. S2 XRD of compound 2.

**5. Fig. S3:** Twisted conformations of ligands  $H_2pdtp$  and their torsion dihedral angles.

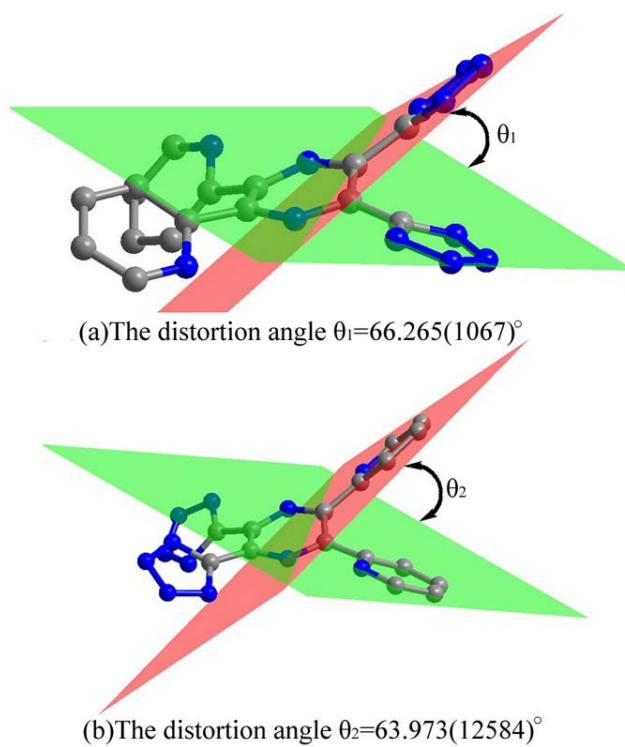

**6. Scheme S3:** Two coordination modes of  $H_2cdtp$  ligands.

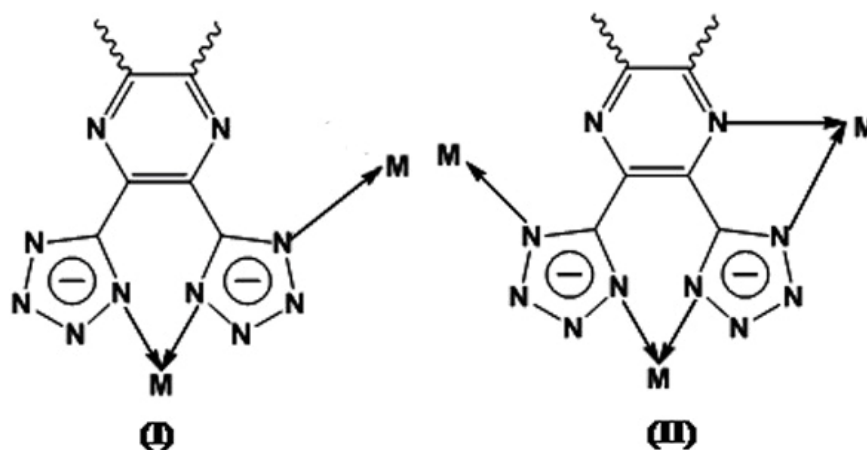

Supplement: c2ra00046f.pdf [file c2ra00046f.pdf]
